# Supplementary material
Source: Springer Nature journal article supplement (https://www.springermedizin.de/resource/supplementary/12911_2013_730_MOESM6_ESM.pdf/9526230)
Supplement: MOESM6 [file 9526230]

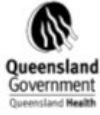

**Metro South Health Service District**  
**Indigenous Health Diabetic Retinopathy Screening Reporting**  
 Community Health

|             |  |
|-------------|--|
| UR Number   |  |
| Surname     |  |
| Other Names |  |
| DOB         |  |
| Sex         |  |

An \* indicates a mandatory field.

|                                          |                                                          |                                                                                             |                                                                                             |  |
|------------------------------------------|----------------------------------------------------------|---------------------------------------------------------------------------------------------|---------------------------------------------------------------------------------------------|--|
| Duration of Disease:                     | <input type="text"/> yrs                                 |                                                                                             |                                                                                             |  |
| HbA1C:                                   | <input type="text"/> %                                   |                                                                                             |                                                                                             |  |
| BP:                                      | <input type="text"/> / <input type="text"/>              |                                                                                             |                                                                                             |  |
| Visual Acuity:                           | L 6 / <input type="text"/><br>R 6 / <input type="text"/> |                                                                                             |                                                                                             |  |
| 1. Adequate photograph for interpreting? | <b>Left Eye:</b>                                         | <input type="radio"/> Yes <input type="radio"/> No <input checked="" type="radio"/> Missing |                                                                                             |  |
|                                          | <b>Right Eye:</b>                                        | <input type="radio"/> Yes <input type="radio"/> No <input checked="" type="radio"/> Missing |                                                                                             |  |
| 2. Appearance of Fundi?                  |                                                          | <b>Left Eye</b>                                                                             | <b>Right Eye</b>                                                                            |  |
|                                          | No NDPR                                                  | <input type="checkbox"/>                                                                    | <input type="checkbox"/>                                                                    |  |
|                                          | Mild NDPR                                                | <input type="checkbox"/>                                                                    | <input type="checkbox"/>                                                                    |  |
|                                          | Moderate NDPR                                            | <input type="checkbox"/>                                                                    | <input type="checkbox"/>                                                                    |  |
|                                          | Severe NDPR                                              | <input type="checkbox"/>                                                                    | <input type="checkbox"/>                                                                    |  |
|                                          | PDR                                                      | <input type="checkbox"/>                                                                    | <input type="checkbox"/>                                                                    |  |
|                                          | Other Pathology                                          | <b>Left Eye</b>                                                                             | <input type="radio"/> Yes <input type="radio"/> No <input checked="" type="radio"/> Missing |  |
|                                          |                                                          | <b>Right Eye</b>                                                                            | <input type="radio"/> Yes <input type="radio"/> No <input checked="" type="radio"/> Missing |  |
| Diagnosis                                | <b>Left Eye</b>                                          | <input type="text"/>                                                                        |                                                                                             |  |
|                                          | <b>Right Eye</b>                                         | <input type="text"/>                                                                        |                                                                                             |  |
| 3. Presence of Diabetic Maculopathy      | <b>Left Eye</b>                                          | <input type="radio"/> Yes <input type="radio"/> No <input checked="" type="radio"/> Missing |                                                                                             |  |
|                                          | <b>Right Eye</b>                                         | <input type="radio"/> Yes <input type="radio"/> No <input checked="" type="radio"/> Missing |                                                                                             |  |
| 4. Management Plan                       |                                                          | <b>Left Eye</b>                                                                             | <b>Right Eye</b>                                                                            |  |
|                                          | No action - review 1-2 years                             | <input type="checkbox"/>                                                                    | <input type="checkbox"/>                                                                    |  |
|                                          | Routine referral to ophthalmologist                      | <input type="checkbox"/>                                                                    | <input type="checkbox"/>                                                                    |  |
|                                          | Urgent referral to ophthalmologist                       | <input type="checkbox"/>                                                                    | <input type="checkbox"/>                                                                    |  |
|                                          | Direct contact with ophthalmologist                      | <input type="checkbox"/>                                                                    | <input type="checkbox"/>                                                                    |  |
|                                          | Inadequate view - repeat photography                     | <input type="checkbox"/>                                                                    | <input type="checkbox"/>                                                                    |  |

|                                                                                             |                                     |
|---------------------------------------------------------------------------------------------|-------------------------------------|
| <b>Sign Off</b>                                                                             |                                     |
| <input type="checkbox"/> <b>Completed?</b> (Select this only when Health Check is complete) |                                     |
| <b>User Name</b> <input type="text"/>                                                       | <input type="button" value="Save"/> |

Health Check Completed by:

Signed:

Date:
